# Supplementary material
Source: publisher figshare collection journal article supplement (https://acs.figshare.com/ndownloader/files/30774090)
Supplement: Supplementary file 1 [file 30774090]

## Supporting Information

# Integrated Approach to Identify Selective PTP1B Inhibitors Targeting the Allosteric Site

Ying Yang<sup>†</sup>, Lei Zhang<sup>†</sup>, Jinying Tian<sup>‡</sup>, Fei Ye<sup>‡</sup>, Zhiyan Xiao<sup>†\*</sup>

<sup>†</sup> *Beijing Key Laboratory of Active Substance Discovery and Druggability Evaluation, Institute of Materia Medica, Chinese Academy of Medical Sciences and Peking Union Medical College, Beijing 100050, P. R. China*

<sup>‡</sup> *Beijing Key Laboratory of New Drug Mechanisms and Pharmacological Evaluation Study, Institute of Materia Medica, Chinese Academy of Medical Sciences & Peking Union Medical College, Beijing 100050, P. R. China*

\* To whom correspondence should be addressed. Phone: +86-10-63189228; Email:

xiaoz@imm.ac.cn

**Table S1.** MM-GBSA free energy decomposition of inhibitor-residue pairs with major contributions from individual residues (kcal/mol).

| <b>PTP1B-2</b>        |                   |                   |                  |                  |                              |
|-----------------------|-------------------|-------------------|------------------|------------------|------------------------------|
| <b>Ligand/Residue</b> | <b>vdW</b>        | <b>ele</b>        | <b>GB</b>        | <b>SA</b>        | <b><math>\Delta E</math></b> |
| <b>2</b>              | -20.16 $\pm$ 0.10 | -12.55 $\pm$ 0.13 | 21.14 $\pm$ 0.08 | -3.36 $\pm$ 0.01 | -14.93 $\pm$ 0.08            |
| Phe280                | -5.42 $\pm$ 0.03  | -0.33 $\pm$ 0.02  | 1.45 $\pm$ 0.02  | -0.84 $\pm$ 0.01 | -5.14 $\pm$ 0.04             |
| Phe196                | -2.11 $\pm$ 0.03  | -0.60 $\pm$ 0.01  | 0.66 $\pm$ 0.01  | -0.24 $\pm$ 0.01 | -2.28 $\pm$ 0.04             |
| Leu192                | -2.04 $\pm$ 0.02  | 0 $\pm$ 0.01      | 0.08 $\pm$ 0.01  | -0.11 $\pm$ 0.01 | -2.06 $\pm$ 0.02             |
| Asn193                | -1.40 $\pm$ 0.02  | -1.04 $\pm$ 0.08  | 0.79 $\pm$ 0.04  | -0.24 $\pm$ 0.01 | -1.89 $\pm$ 0.03             |
| Ala189                | -1.20 $\pm$ 0.01  | -0.58 $\pm$ 0.01  | 0.90 $\pm$ 0.01  | -0.21 $\pm$ 0.01 | -1.09 $\pm$ 0.01             |
| Met282                | -0.93 $\pm$ 0.02  | -0.42 $\pm$ 0.02  | 0.50 $\pm$ 0.01  | -0.16 $\pm$ 0.01 | -1.01 $\pm$ 0.02             |
| <b>PTP1B-H3</b>       |                   |                   |                  |                  |                              |
| <b>Ligand/Residue</b> | <b>vdW</b>        | <b>ele</b>        | <b>GB</b>        | <b>SA</b>        | <b><math>\Delta E</math></b> |
| <b>H3</b>             | -22.67 $\pm$ 0.08 | -11.60 $\pm$ 0.11 | 19.42 $\pm$ 0.09 | -3.67 $\pm$ 0.02 | -18.52 $\pm$ 0.09            |
| Phe280                | -4.98 $\pm$ 0.04  | 0.35 $\pm$ 0.02   | 1.10 $\pm$ 0.02  | -0.76 $\pm$ 0.01 | -4.30 $\pm$ 0.04             |
| Phe196                | -3.12 $\pm$ 0.03  | -0.77 $\pm$ 0.01  | 0.84 $\pm$ 0.01  | -0.43 $\pm$ 0.01 | -3.48 $\pm$ 0.04             |
| Asn193                | -2.17 $\pm$ 0.02  | -0.41 $\pm$ 0.06  | 0.96 $\pm$ 0.04  | -0.31 $\pm$ 0.01 | -1.93 $\pm$ 0.03             |
| Leu192                | -1.91 $\pm$ 0.02  | -0.09 $\pm$ 0.01  | 0.24 $\pm$ 0.01  | -0.16 $\pm$ 0.01 | -1.92 $\pm$ 0.02             |
| Lys279                | -1.62 $\pm$ 0.02  | -2.11 $\pm$ 0.06  | 2.44 $\pm$ 0.07  | -0.19 $\pm$ 0.01 | -1.48 $\pm$ 0.02             |
| Glu276                | -1.13 $\pm$ 0.02  | -4.78 $\pm$ 0.08  | 4.74 $\pm$ 0.10  | -0.16 $\pm$ 0.01 | -1.33 $\pm$ 0.03             |
| Met282                | -1.28 $\pm$ 0.02  | -0.15 $\pm$ 0.01  | 0.44 $\pm$ 0.01  | -0.21 $\pm$ 0.01 | -1.20 $\pm$ 0.03             |
| Trp291                | -1.17 $\pm$ 0.02  | -0.19 $\pm$ 0.01  | 0.59 $\pm$ 0.01  | -0.23 $\pm$ 0.01 | -1.00 $\pm$ 0.02             |
| Ala189                | -0.91 $\pm$ 0.01  | 0.15 $\pm$ 0.01   | 0.25 $\pm$ 0.01  | -0.16 $\pm$ 0.01 | -0.67 $\pm$ 0.02             |
| <b>PTP1B-H9</b>       |                   |                   |                  |                  |                              |
| <b>Ligand/Residue</b> | <b>vdW</b>        | <b>ele</b>        | <b>GB</b>        | <b>SA</b>        | <b><math>\Delta E</math></b> |
| <b>H9</b>             | -22.12 $\pm$ 0.10 | -4.23 $\pm$ 0.10  | 13.08 $\pm$ 0.10 | -3.62 $\pm$ 0.01 | -16.89 $\pm$ 0.10            |
| Phe280                | -5.02 $\pm$ 0.03  | -0.46 $\pm$ 0.01  | 1.13 $\pm$ 0.01  | -0.54 $\pm$ 0.01 | -4.89 $\pm$ 0.03             |
| Asn193                | -4.27 $\pm$ 0.02  | -1.03 $\pm$ 0.04  | 2.79 $\pm$ 0.03  | -0.45 $\pm$ 0.01 | -2.96 $\pm$ 0.03             |
| Phe196                | -2.57 $\pm$ 0.02  | -0.69 $\pm$ 0.02  | 0.60 $\pm$ 0.01  | -0.11 $\pm$ 0.01 | -2.76 $\pm$ 0.03             |
| Leu192                | -2.11 $\pm$ 0.02  | -0.35 $\pm$ 0.02  | 0.42 $\pm$ 0.01  | -0.08 $\pm$ 0.00 | -2.14 $\pm$ 0.02             |
| Ala189                | -2.00 $\pm$ 0.02  | -0.60 $\pm$ 0.01  | 0.98 $\pm$ 0.01  | -0.25 $\pm$ 0.01 | -1.88 $\pm$ 0.02             |
| Lys197                | -2.13 $\pm$ 0.02  | 1.48 $\pm$ 0.05   | -0.43 $\pm$ 0.05 | -0.16 $\pm$ 0.01 | -1.25 $\pm$ 0.03             |

vdW = van der Waals contribution from MM.

ele = electrostatic energy as calculated by the MM force field.

GB = the electrostatic contribution to the solvation free energy calculated by GB.

SA = non-polar contribution to the solvation free energy calculated by an empirical model.

$\Delta E$  = sum of energetic contributions calculated from the terms above (kcal/mol).

**Table S2.** Comparisons of critical residues at the allosteric site of PTP1B with other pTyr-specific phosphatases.

| Classification of pTyr-specific phosphatases                                            | PDBcode <sup>a</sup> | Position1 | Position2 | Position3           |
|-----------------------------------------------------------------------------------------|----------------------|-----------|-----------|---------------------|
| PTP1B<br>(Protein tyrosine phosphatase 1B)                                              | 1T4J                 | Asn193    | Phe196    | Phe280              |
| TC-PTP<br>(T-Cell Protein Tyrosine Phosphatase)                                         | 1L8K                 | Asn194    | Phe197    | Cys278 <sup>b</sup> |
| SHP2<br>(Src homology-2 domain-containing protein tyrosine phosphatase-2)               | 3O5X                 | Asp437    | Glu440    | Thr524              |
| LAR<br>(Receptor-type tyrosine-protein phosphatase F, Leukocyte common antigen related) | 1LAR                 | Ala1502   | Arg1505   | Cys1584             |
| CD45<br>(Receptor-type tyrosine-protein phosphatase C, CD antigen CD45)                 | 1YGR                 | Lys808    | Arg811    | Phe890              |
| LYP<br>(lymphoid-specific protein tyrosine phosphatase)                                 | 2P6X                 | Glu207    | Trp210    | Arg292              |
| VHR<br>(human vaccinia H1-related phosphatase)                                          | 1VHR                 | Arg104    | Asp107    | Glu180              |
| PTPN9/MEG2<br>(protein tyrosine phosphatase PTPN9)                                      | 2PA5                 | Asp482    | Arg485    | Lys577              |
| PTP $\alpha$<br>(Receptor-type tyrosine-protein phosphatase alpha)                      | 6UZT                 | Lys413    | Lys416    | Tyr495              |

<sup>a</sup> Organism sources: Homo sapiens; <sup>b</sup> not determined in the crystal structure of 1L8K.

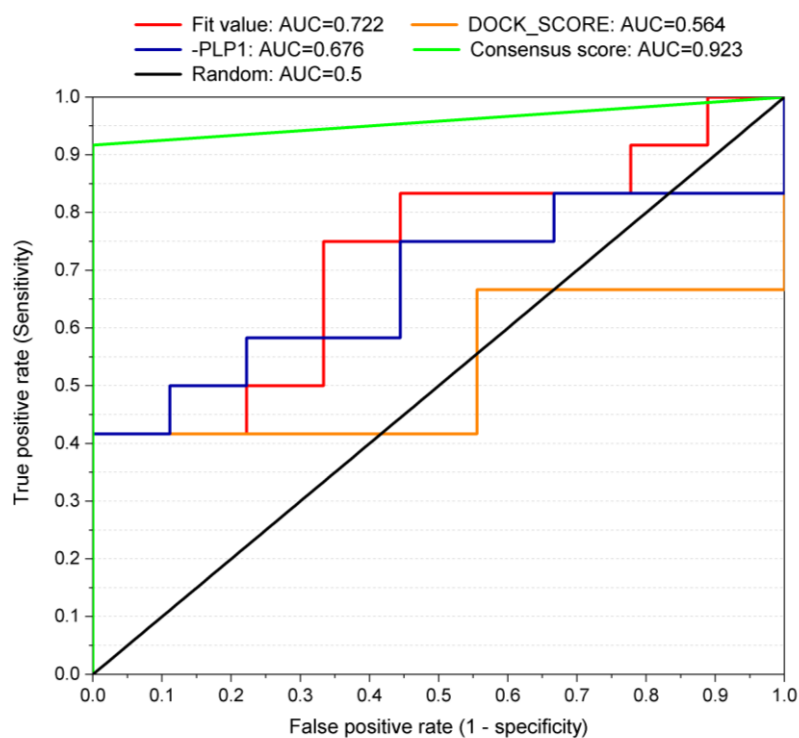

**Figure S1.** The ROC curve derived from different scores. When the number of highly active compounds ( $IC_{50} < 1 \mu M$ ) identified versus the number of compounds screened by different scoring functions was monitored, the area under the ROC curve (AUC) was measured by plotting ROC curves. The consensus score was consisted of -PLP1, DOCK\_SCORE from LigandFit docking and Fit value from the CBP model.

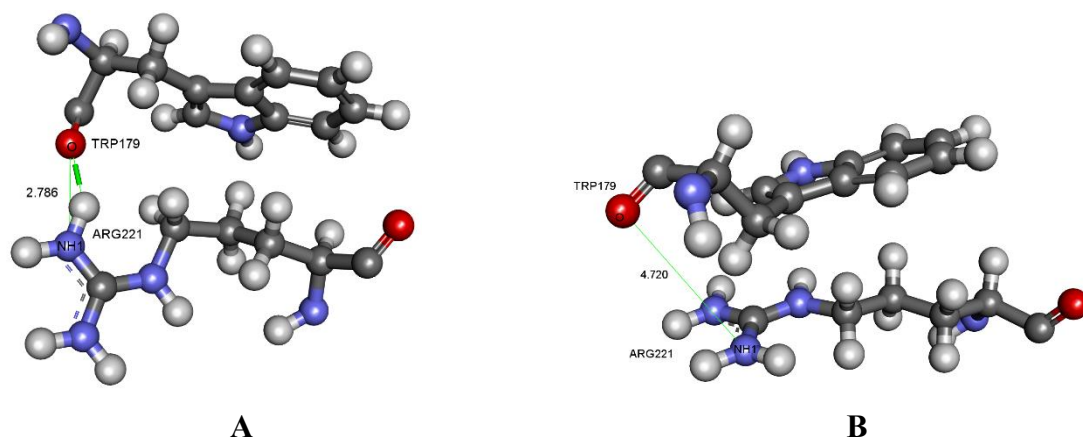

**Figure S2.** The distance was measured in (A) the closed conformation (PDB code: 1PTY) and (B) the open conformation (PDB code: 1T4J).

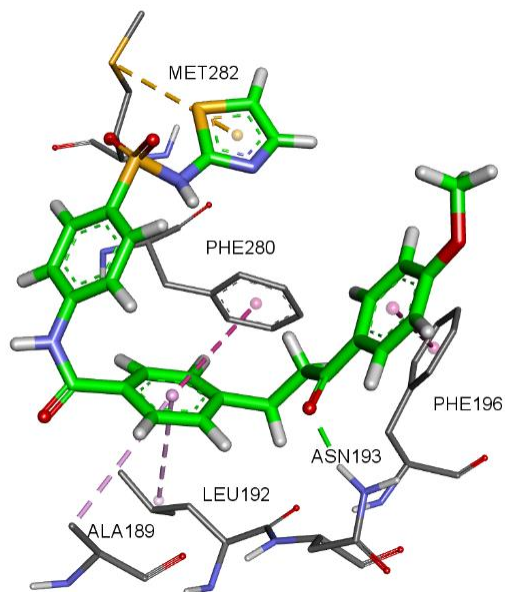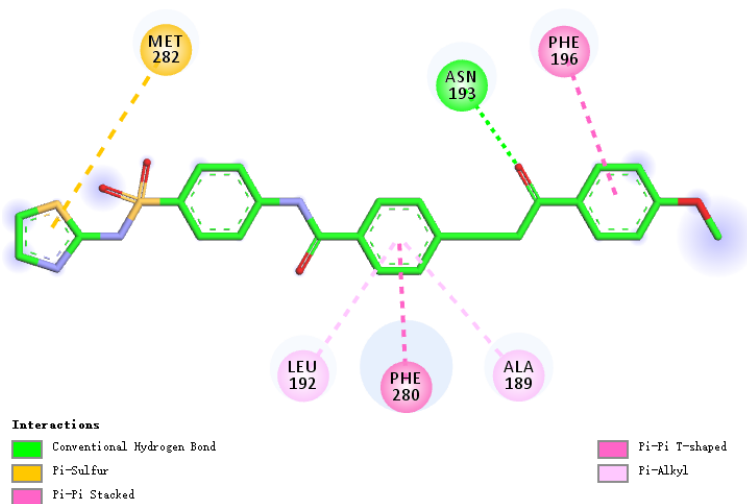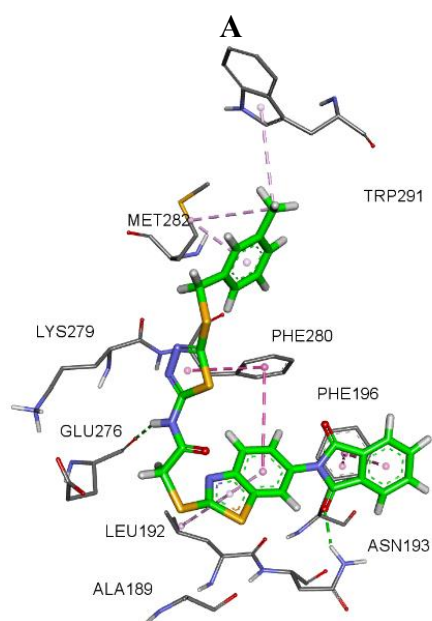

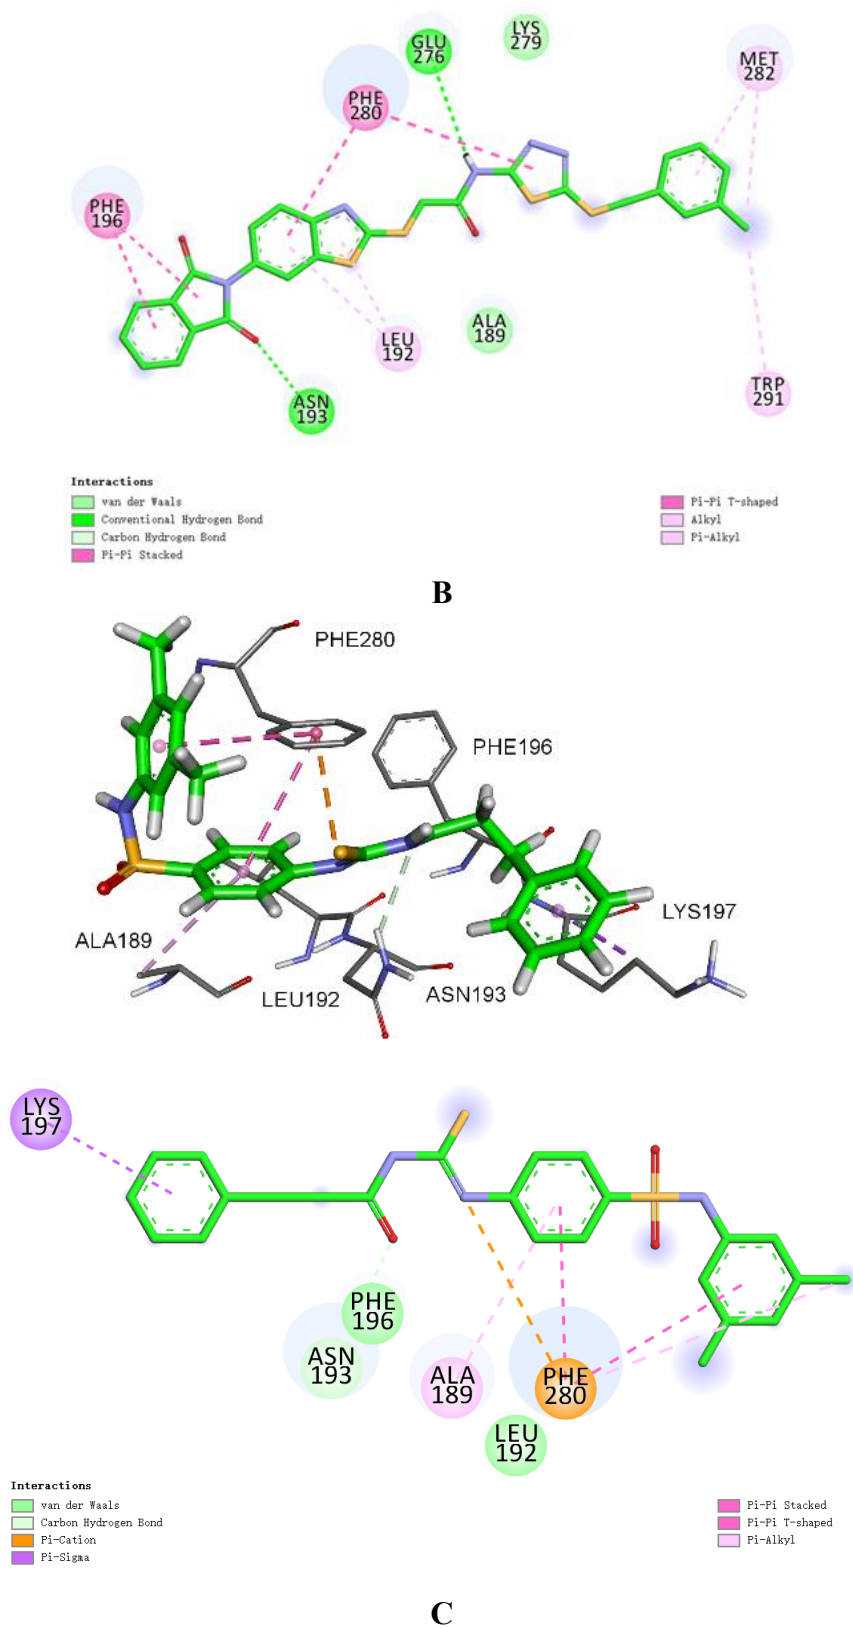

**Figure S3.** The 3D graphics and 2D plots for binding modes of (A) **2**, (B) **H3** and (C) **H9** at PTP1B allosteric site with representative conformations from MD simulations.
